# Supplementary material
Source: PubMed Central journal article supplement (PMC6948775)
Supplement: jciinsight-4-121951-s058.pdf [file jciinsight-4-121951-s058.pdf]

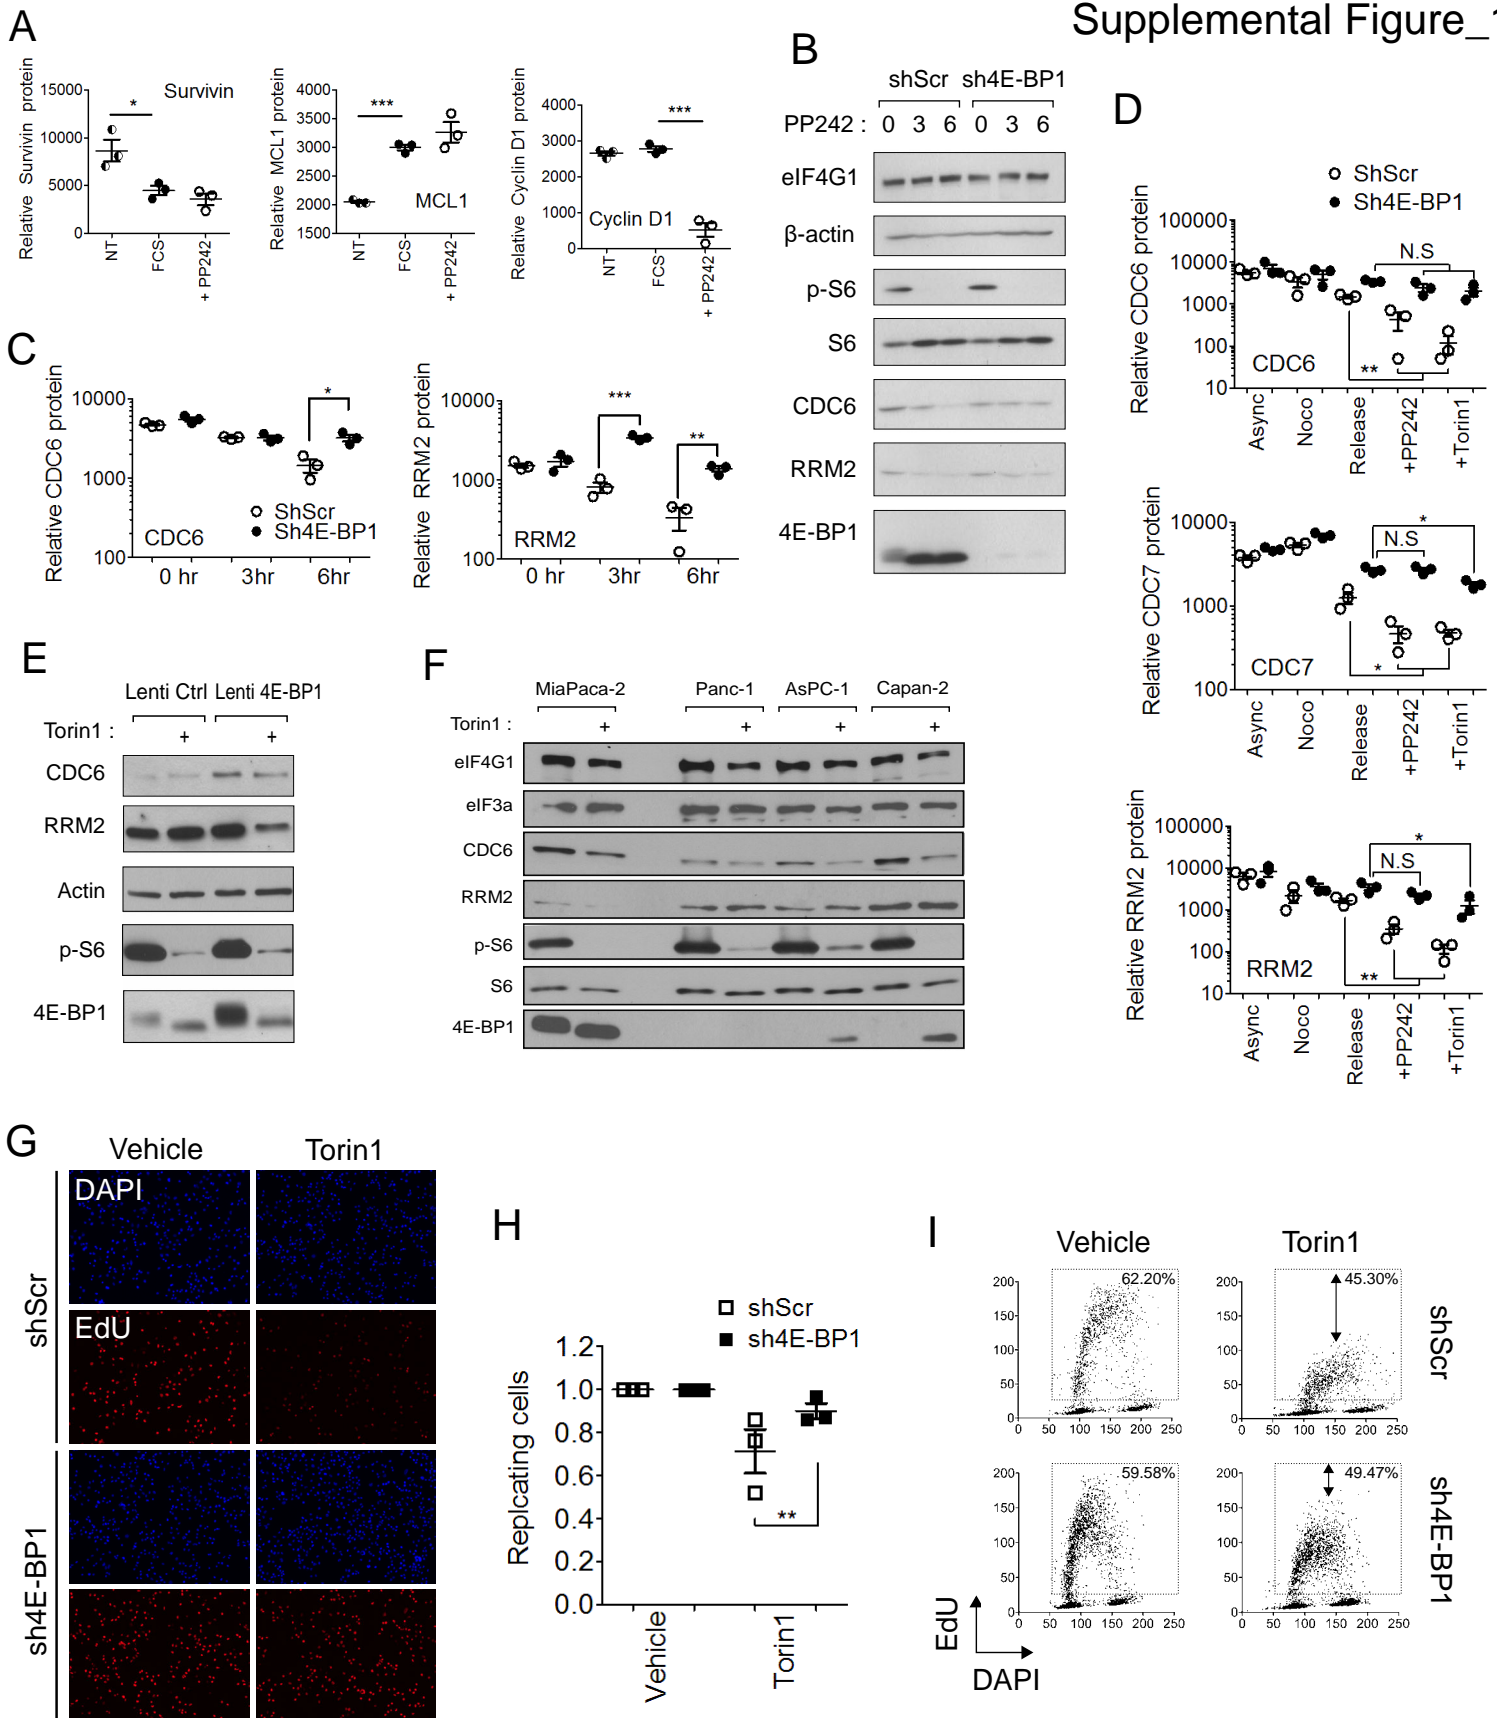

Supplemental Figure 1: A) Quantification of relative Cyclin D1, MCL1 and Survivin protein levels from Fig. 1A. B) Western blot analysis of indicated proteins in shScr or sh4E-BP1 MiaPaca-2 cells treated with vehicle or PP242 (5 $\mu$ M) for 3h and 6h.  $\beta$ -actin served as a loading control (2 independent experiments). C-D) Quantification of relative CDC6, RRM2 and CDC7 protein levels from (C) Fig. 2C and (D) Fig. 2D. P values were calculated using Student's t-test (\* $P$ <0.05, \*\* $P$ <0.01). E) Western blot analysis of indicated proteins in Lenti Ctrl or Lenti 4E-BP1 Panc-1 cells treated with Torin1 (0.5 $\mu$ M) for 3h (n=3). eIF4G1 served as loading control. F) Western blot analysis of indicated proteins in MiaPaca-2, Panc-1, AsPC-1 and Capan-2 cells treated with vehicle or Torin1 (500nM) for 3hrs (n=3). G) Asynchronous shScramble or sh4E-BP1 MiaPaca-2 cells were incubated with Torin1 (0.5 $\mu$ M) for 3hrs and labeled with EdU (n=3). Nuclear DNA was counterstained by DAPI. H) The proportions of replicating cells are shown as means and standard deviations and were generated from at least three independent experiments. P values were calculated using two-way ANOVA (\*\* $P$ <0.01). I) Quantitative image-based cytometry single-cell analysis (QIBC) of EdU-labeled cells. Total EdU and DAPI values from (G) are plotted in a scatter diagram. Percentages indicate the proportion of replicating cell.

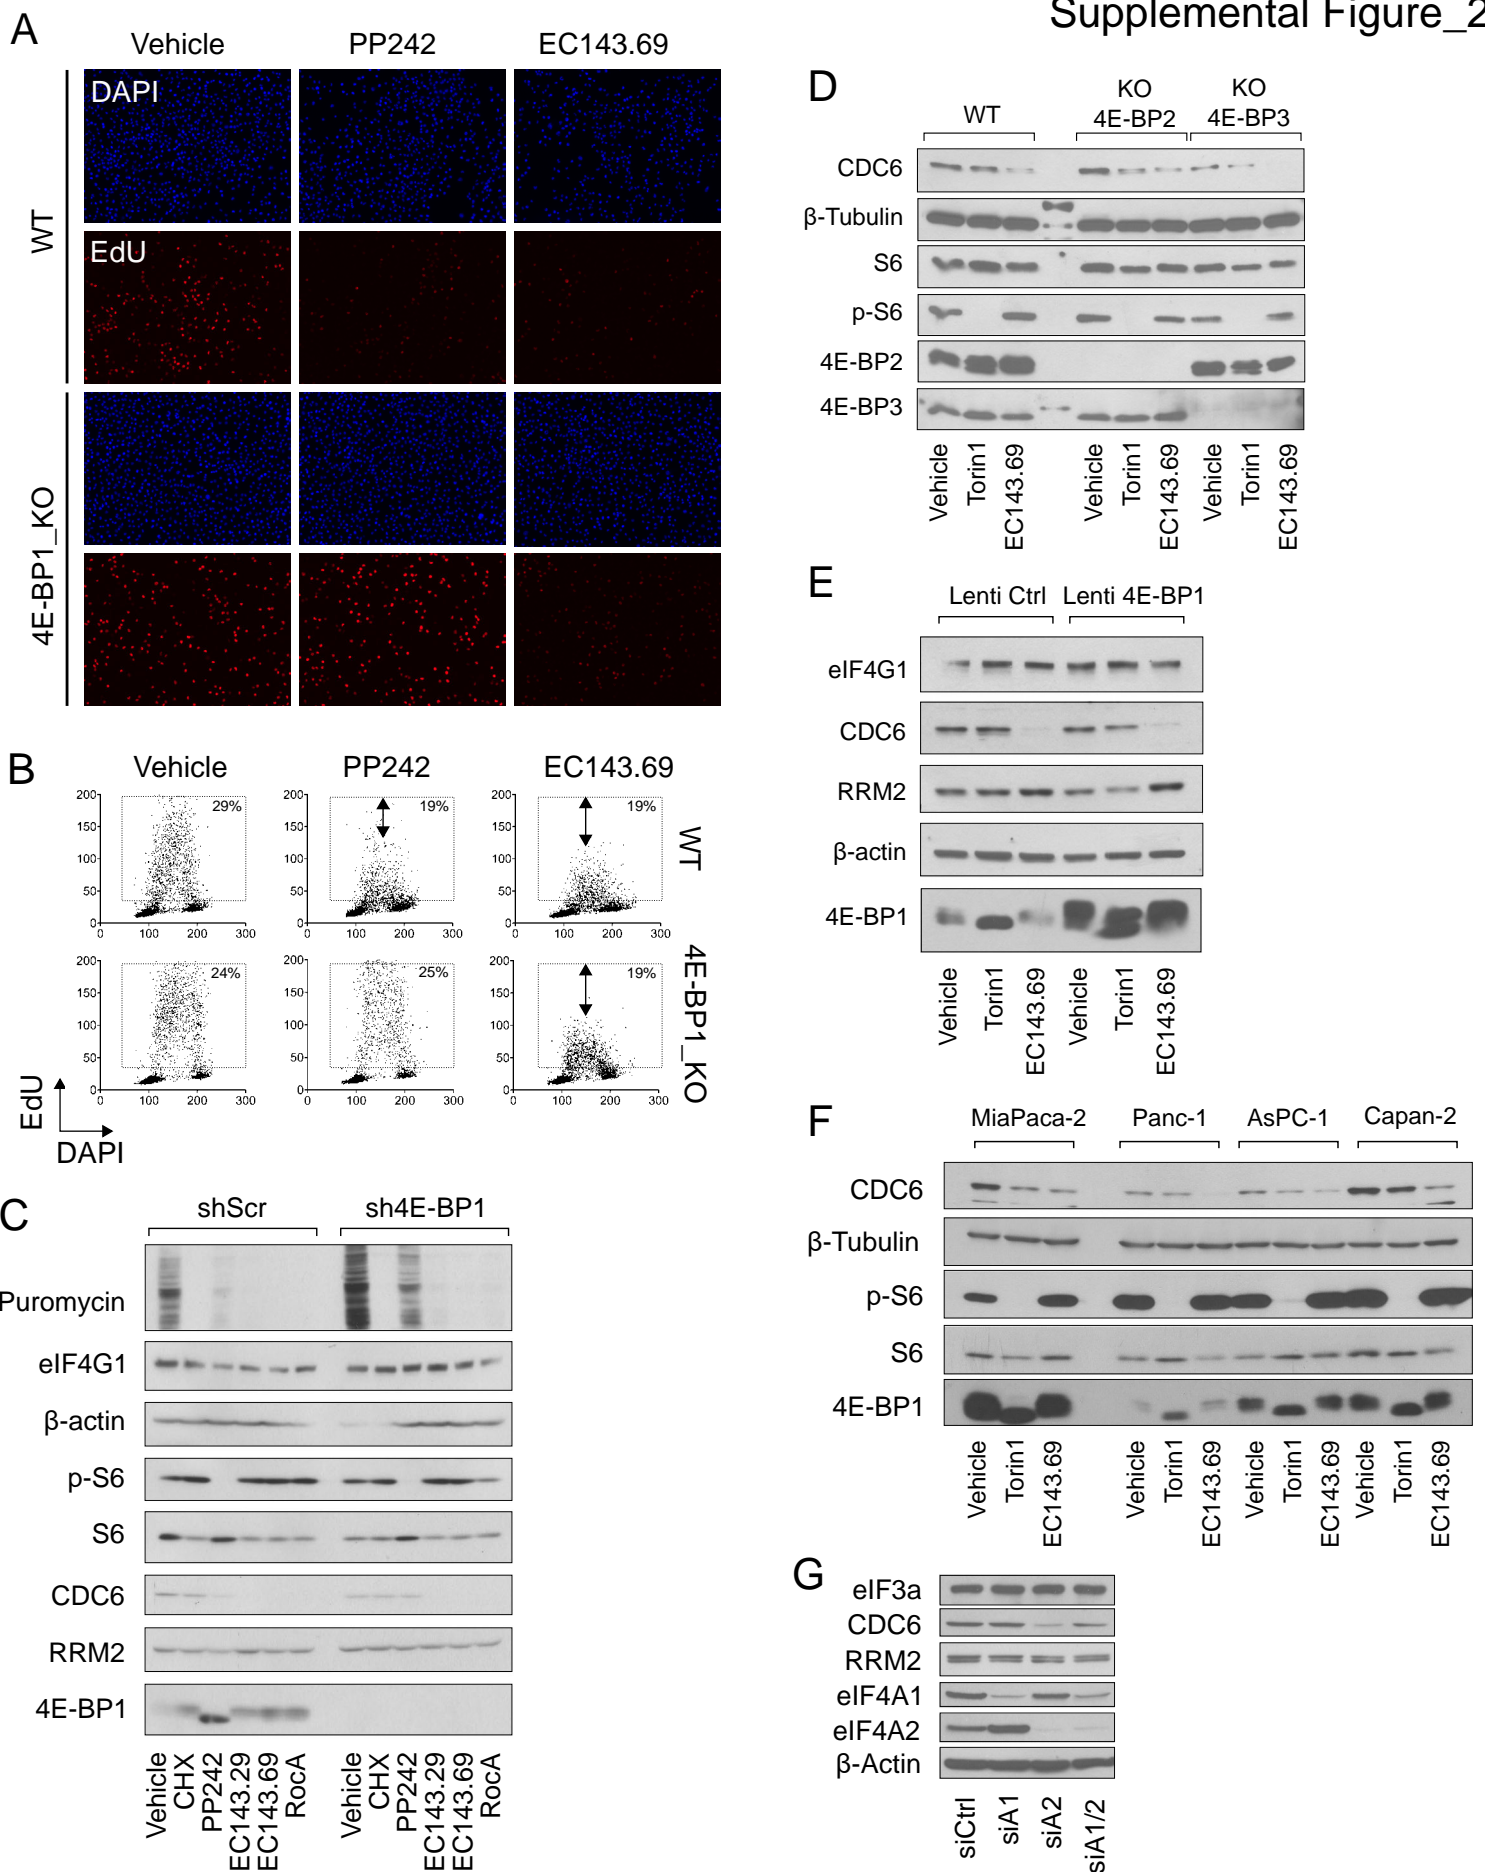

Supplemental Figure 2: A) Asynchronous WT or 4E-BP1 KO MiaPaca-2 cells were incubated with PP242 (5 $\mu$ M) or EC143.69 (50nM) for 3hrs and labeled with EdU. Nuclear DNA was counterstained by DAPI (n=3) B) Quantitative image-based cytometry single-cell analysis (QIBC) of EdU-labeled cells. Total EdU and DAPI values from (A) are plotted in a scatter diagram. Percentages indicate the proportion of replicating cells. C) Western blot analysis of indicated proteins in shScr or sh4E-BP1 MiaPaca-2 cells treated with vehicle or PP242 (2.5 $\mu$ M), EC143.29, EC143.69 (50nM) and RocA (500nM) for 3hrs or with Cycloheximide (CHX, 100 $\mu$ g/ml) for 15 min (n=2). D-F) Western blot analysis of indicated proteins in WT, 4E-BP2 KO or 4E-BP3 KO MiaPaca-2 cells (D), in Lenti Ctrl or Lenti 4E-BP1 Panc-1 cells (E) and in MiaPaca-2, Panc-1, AsPC-1 and Capan-2 cells (F) treated with vehicle or Torin1 (500nM) or EC143.69 (50nM) for 3hrs. G) Western blot analysis of indicated proteins in MiaPaca-2 cells transfected with siRNA targeting eIF4A1 (siA1), eIF4A2 (siA2), both eIF4A1 and eIF4A2 (siA1/2) or with a control siRNA (siCtrl). Representative of 3 independent experiments.

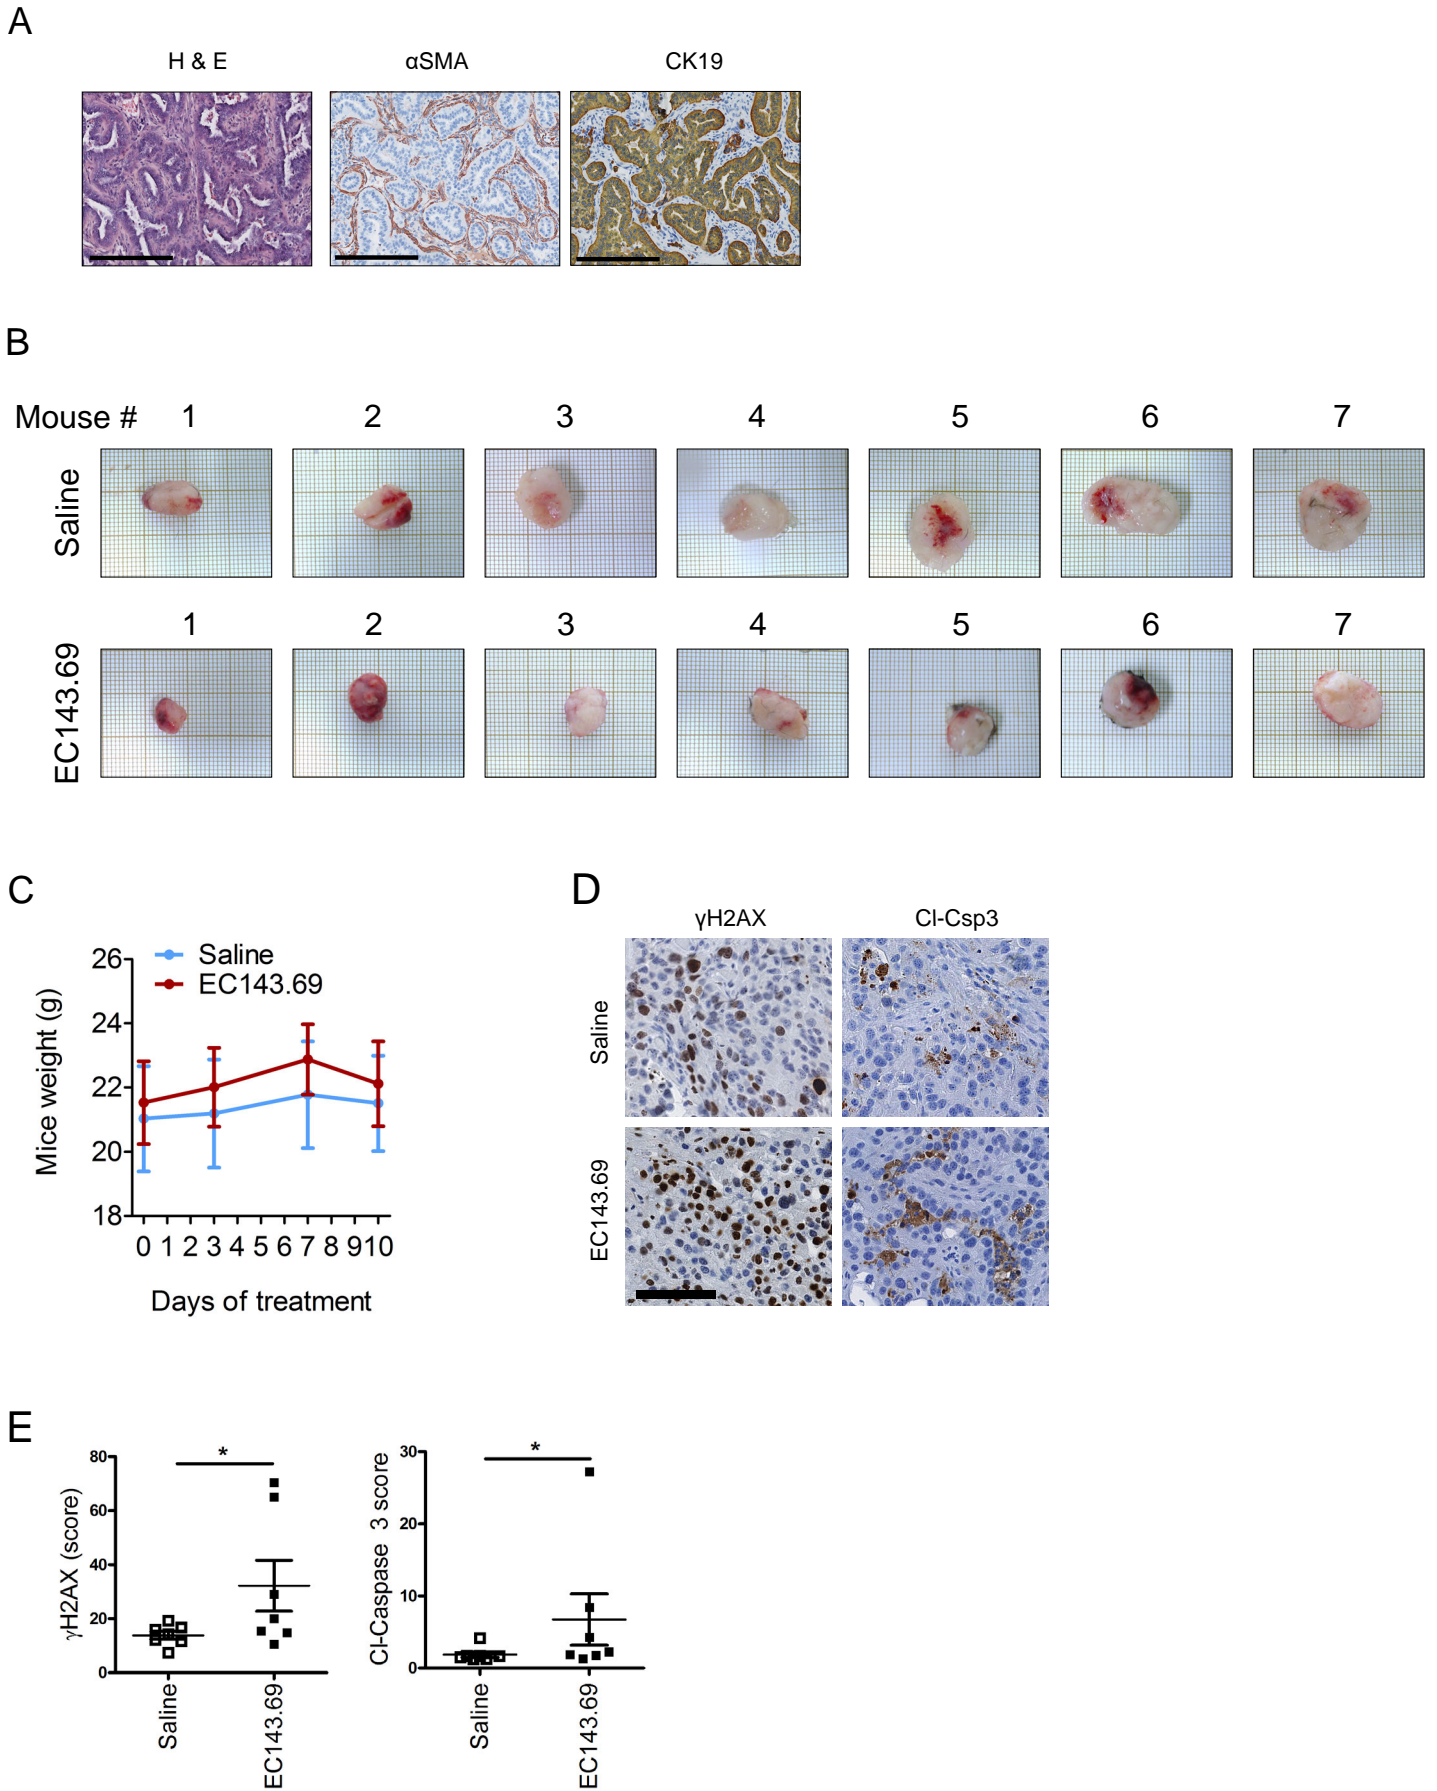

Supplemental Figure 3: A) Representative hematoxylin/eosin (H&E) and IHC stainings with  $\alpha$ SMA and CK19 of untreated tumor 20 days after engrafting. Scale bar 250 $\mu$ m. B) Pictures of tumors at sacrifice after treatment with Saline (top) or EC-143.69 (bottom). C) Line graphs showing average body weight of EC143.69-injected (red) and saline-injected mice (blue). Mean  $\pm$  SEM. D) Representative IHC stainings of tumors from Saline- (top) or EC-143.69- (bottom)-injected mice. Scale bar 30 $\mu$ m. E) Quantification of  $\gamma$ H2AX- and cleaved caspase 3 (Cl-Csp3) positive cells performed on five random 10X magnification fields in each mouse. Mean  $\pm$  SEM. P values were calculated using Student's t-test (\*P<0.05).

**Supplementary table 1 : Genes repressed at the translational level following mTOR inhibition**

| chipID | GeneSymbol | PP242<br>FC (log2) | PP242<br>FDR |
|--------|------------|--------------------|--------------|
| 16     | AARS       | -0,722119698       | 0,000503715  |
| 55347  | ABHD10     | -0,793795273       | 5,20E-05     |
| 39     | ACAT2      | -1,423013509       | 1,03E-05     |
| 65057  | ACD        | -0,711157867       | 0,000308383  |
| 22985  | ACIN1      | -0,662652349       | 0,001601943  |
| 60     | ACTB       | -0,717440684       | 0,016338566  |
| 97     | ACYP1      | -0,76733161        | 0,002215638  |
| 135    | ADORA2A    | -0,788720647       | 0,048467101  |
| 84632  | AFAP1L2    | -0,756430548       | 0,000465707  |
| 8540   | AGPS       | -0,613402869       | 0,00264513   |
| 10598  | AHSA1      | -0,656420602       | 0,003680415  |
| 204    | AK2        | -0,673862433       | 0,001312464  |
| 64577  | ALDH8A1    | -0,624666658       | 0,053940092  |
| 79053  | ALG8       | -0,716101783       | 0,002213064  |
| 10189  | ALYREF     | -0,705445422       | 0,000359494  |
| 84250  | ANKRD32    | -1,189306272       | 4,36E-06     |
| 129138 | ANKRD54    | -0,732341957       | 0,000183638  |
| 54443  | ANLN       | -1,576113229       | 1,46E-05     |
| 8125   | ANP32A     | -0,620008156       | 0,001901294  |
| 1175   | AP2S1      | -0,781613396       | 8,51E-05     |
| 9582   | APOBEC3B   | -1,060977682       | 5,48E-05     |
| 79135  | APOO       | -0,775839429       | 0,020203903  |
| 378    | ARF4       | -0,598902126       | 0,015796917  |
| 384    | ARG2       | -0,690373696       | 0,025822326  |
| 9824   | ARHGAP11A  | -1,115800983       | 0,000143309  |
| 200894 | ARL13B     | -0,750772242       | 0,000346069  |
| 55156  | ARMC1      | -0,598419535       | 0,000587982  |
| 140462 | ASB9       | -0,961690145       | 0,023186597  |
| 25842  | ASF1A      | -0,763478997       | 0,002540984  |
| 55723  | ASF1B      | -1,352733014       | 0,000131953  |
| 440    | ASNS       | -1,422727185       | 0,002311415  |
| 259266 | ASPM       | -0,835506407       | 0,001989641  |
| 80150  | ASRGL1     | -0,818681011       | 0,000143309  |
| 29028  | ATAD2      | -1,513447838       | 2,38E-06     |
| 79915  | ATAD5      | -0,917208346       | 0,008244949  |
| 481    | ATP1B1     | -0,776404593       | 0,004460199  |
| 516    | ATP5G1     | -0,672961997       | 0,000842218  |
| 523    | ATP6V1A    | -0,670642542       | 0,002205835  |
| 84126  | ATRIP      | -0,63523753        | 0,005702258  |
| 6790   | AURKA      | -1,460153496       | 4,77E-06     |
| 9212   | AURKB      | -1,709426369       | 1,71E-06     |
| 60370  | AVPI1      | -0,806762861       | 0,004739619  |
| 9532   | BAG2       | -0,797026751       | 0,001989641  |
| 9531   | BAG3       | -0,710413093       | 0,000258279  |
| 580    | BARD1      | -1,186951789       | 5,72E-05     |
| 581    | BAX        | -0,616068833       | 0,149415543  |
| 586    | BCAT1      | -0,851906804       | 0,051661725  |
| 83596  | BCL2L12    | -0,650568876       | 0,003116023  |
| 622    | BDH1       | -0,641974527       | 0,000426856  |
| 332    | BIRC5      | -0,984556717       | 5,48E-05     |



|        |           |              |             |
|--------|-----------|--------------|-------------|
| 641    | BLM       | -1,440392007 | 1,00E-05    |
| 642    | BLMH      | -0,837880932 | 8,84E-05    |
| 388962 | BOLA3     | -0,948988746 | 0,000250275 |
| 79866  | BORA      | -1,047430874 | 8,16E-05    |
| 10380  | BPNT1     | -0,741294543 | 0,003487701 |
| 672    | BRCA1     | -1,133825993 | 8,00E-05    |
| 675    | BRCA2     | -1,003656401 | 3,37E-05    |
| 83990  | BRIP1     | -0,860388167 | 0,000352258 |
| 25874  | BRP44     | -0,738111472 | 0,000537953 |
| 10950  | BTG3      | -0,795591521 | 0,003800817 |
| 699    | BUB1      | -1,108669214 | 9,38E-06    |
| 701    | BUB1B     | -1,2864848   | 4,12E-06    |
| 9184   | BUB3      | -0,627592993 | 0,001179728 |
| 84811  | BUD13     | -0,692085746 | 0,000148212 |
| 51501  | C11orf73  | -0,602914476 | 0,069106091 |
| 220042 | C11orf82  | -0,761722209 | 0,000885155 |
| 84915  | C12orf34  | -0,652576923 | 0,011902416 |
| 57103  | C12orf5   | -0,834846766 | 0,00033551  |
| 283643 | C14orf80  | -0,635189088 | 0,003141014 |
| 90417  | C15orf23  | -0,832478203 | 0,000144147 |
| 90381  | C15orf42  | -0,906445434 | 0,000510504 |
| 84419  | C15orf48  | -0,931745458 | 0,011122948 |
| 80178  | C16orf59  | -0,710066903 | 0,002252674 |
| 494514 | C18orf56  | -0,841071176 | 0,000261143 |
| 55732  | C1orf112  | -1,630824916 | 8,09E-06    |
| 79000  | C1orf135  | -0,850673758 | 0,001298432 |
| 339448 | C1orf174  | -0,597983984 | 0,001099449 |
| 140706 | C20orf160 | -0,992282462 | 0,000519955 |
| 92667  | C20orf72  | -0,62135723  | 0,001192494 |
| 56941  | C3orf37   | -0,638095161 | 0,000661723 |
| 54969  | C4orf27   | -0,811153861 | 0,00014272  |
| 201725 | C4orf46   | -0,817488209 | 0,001551418 |
| 375444 | C5orf34   | -1,244341057 | 5,39E-05    |
| 79624  | C6orf211  | -0,681584367 | 0,000557118 |
| 55071  | C9orf40   | -0,892896971 | 0,000178349 |
| 81928  | CABLES2   | -0,822846051 | 0,000227179 |
| 55832  | CAND1     | -0,635086636 | 0,000313127 |
| 833    | CARS      | -0,754326073 | 0,005478262 |
| 57082  | CASC5     | -0,658680505 | 0,006102599 |
| 9994   | CASP8AP2  | -0,720632322 | 0,00230183  |
| 865    | CBFB      | -0,59419149  | 0,001980094 |
| 55013  | CCDC109B  | -0,658812587 | 0,001665879 |
| 165055 | CCDC138   | -0,79005828  | 0,000265391 |
| 126661 | CCDC163P  | -0,688013466 | 0,006689919 |
| 79140  | CCDC28B   | -0,929056676 | 0,000331626 |
| 253635 | CCDC75    | -0,668996492 | 0,010769452 |
| 84318  | CCDC77    | -1,038753203 | 0,001125679 |
| 54908  | CCDC99    | -1,121824115 | 0,00033823  |
| 890    | CCNA2     | -1,404403267 | 5,31E-06    |
| 891    | CCNB1     | -1,01063914  | 2,46E-05    |
| 9133   | CCNB2     | -0,93414994  | 0,00016213  |
| 896    | CCND3     | -1,033616356 | 0,000165034 |
| 9134   | CCNE2     | -1,582981047 | 5,98E-05    |
| 899    | CCNF      | -1,035234432 | 2,36E-05    |

|        |         |              |             |
|--------|---------|--------------|-------------|
| 9738   | CCP110  | -0,634148484 | 0,005037041 |
| 991    | CDC20   | -0,825944125 | 0,000372852 |
| 8697   | CDC23   | -0,766366504 | 0,000994142 |
| 993    | CDC25A  | -1,187897776 | 0,001879303 |
| 995    | CDC25C  | -0,892072237 | 0,000248978 |
| 8318   | CDC45   | -1,940270988 | 2,04E-05    |
| 990    | CDC6    | -2,52553778  | 1,01E-05    |
| 8317   | CDC7    | -1,14197651  | 3,40E-05    |
| 157313 | CDCA2   | -1,345584188 | 2,31E-05    |
| 83461  | CDCA3   | -1,315422983 | 5,31E-06    |
| 55038  | CDCA4   | -0,749965272 | 0,000381703 |
| 113130 | CDCA5   | -1,390326181 | 0,000131953 |
| 55143  | CDCA8   | -1,551488532 | 5,39E-06    |
| 983    | CDK1    | -2,25512795  | 2,26E-05    |
| 1017   | CDK2    | -1,522310335 | 6,11E-06    |
| 8099   | CDK2AP1 | -0,842433726 | 0,007418004 |
| 1031   | CDKN2C  | -1,040720229 | 0,000834956 |
| 1032   | CDKN2D  | -1,077519903 | 0,000144147 |
| 1033   | CDKN3   | -0,78163066  | 0,001227528 |
| 1039   | CDR2    | -0,715385482 | 0,00276937  |
| 81620  | CDT1    | -1,016263855 | 5,80E-05    |
| 1054   | CEBPG   | -0,876710004 | 0,001909738 |
| 1058   | CENPA   | -1,220188162 | 8,13E-05    |
| 1060   | CENPC1  | -0,599225482 | 0,028899799 |
| 1063   | CENPF   | -0,729531958 | 0,002353656 |
| 64946  | CENPH   | -0,80052507  | 0,011438541 |
| 2491   | CENPI   | -1,18678184  | 5,39E-06    |
| 64105  | CENPK   | -1,560060422 | 6,46E-06    |
| 91687  | CENPL   | -1,19969589  | 2,31E-05    |
| 79019  | CENPM   | -1,089932482 | 1,65E-05    |
| 79172  | CENPO   | -0,672299405 | 0,004750552 |
| 55166  | CENPQ   | -1,614682086 | 4,91E-06    |
| 387103 | CENPW   | -1,007161993 | 8,13E-05    |
| 145508 | CEP128  | -0,867587993 | 3,42E-05    |
| 22995  | CEP152  | -0,815447661 | 0,01067436  |
| 55165  | CEP55   | -0,871430868 | 0,000156971 |
| 285753 | CEP57L1 | -0,671765708 | 0,002587219 |
| 55722  | CEP72   | -0,783840896 | 0,000798701 |
| 79959  | CEP76   | -0,682309898 | 0,004737963 |
| 84131  | CEP78   | -1,094657973 | 1,55E-05    |
| 494143 | CHAC2   | -0,990683713 | 4,55E-05    |
| 10036  | CHAF1A  | -1,491449931 | 4,91E-06    |
| 8208   | CHAF1B  | -1,243664641 | 2,31E-05    |
| 84303  | CHCHD6  | -0,671288787 | 0,000785459 |
| 1111   | CHEK1   | -0,705112144 | 0,000195088 |
| 26973  | CHORDC1 | -0,619516607 | 0,016903779 |
| 1138   | CHRNA5  | -0,688179511 | 0,002635745 |
| 1147   | CHUK    | -0,649566509 | 0,056237786 |
| 57019  | CIAPIN1 | -0,660304732 | 0,001928008 |
| 26586  | CKAP2   | -0,690004041 | 0,001592473 |
| 150468 | CKAP2L  | -1,330197119 | 9,38E-06    |
| 1164   | CKS2    | -0,904770879 | 0,001776734 |
| 63967  | CLSPN   | -0,948979882 | 0,000173103 |
| 56942  | CMC2    | -0,87373366  | 0,000745501 |

|        |         |              |             |
|--------|---------|--------------|-------------|
| 1278   | COL1A2  | -0,9220423   | 0,006465417 |
| 1281   | COL3A1  | -0,888458685 | 0,001814337 |
| 51397  | COMMD10 | -0,817802228 | 0,018393315 |
| 8533   | COPS3   | -0,816424256 | 0,000296966 |
| 10987  | COPS5   | -0,660617067 | 0,002775392 |
| 27235  | COQ2    | -0,661732218 | 0,000271895 |
| 51805  | COQ3    | -0,767236936 | 0,000152132 |
| 11151  | CORO1A  | -1,401678095 | 4,37E-05    |
| 10328  | COX4NB  | -0,670574965 | 0,001140242 |
| 1434   | CSE1L   | -0,743053099 | 0,006389535 |
| 1466   | CSRP2   | -0,813485341 | 0,000572389 |
| 1479   | CSTF3   | -0,678362662 | 0,00074003  |
| 1491   | CTH     | -0,619273723 | 0,009473569 |
| 1503   | CTPS    | -0,858987568 | 0,010277984 |
| 51076  | CUTC    | -0,760747661 | 0,000170234 |
| 1528   | CYB5A   | -0,628057678 | 0,012551712 |
| 10926  | DBF4    | -0,831997093 | 0,000178516 |
| 1622   | DBI     | -0,967661678 | 0,001874969 |
| 1633   | DCK     | -0,803465649 | 0,005403908 |
| 64858  | DCLRE1B | -0,78136331  | 5,85E-05    |
| 79077  | DCTPP1  | -0,747454648 | 0,002503647 |
| 1643   | DDB2    | -0,80463902  | 0,000159397 |
| 54541  | DDIT4   | -1,390939338 | 0,004080104 |
| 1663   | DDX11   | -0,595872178 | 0,028114501 |
| 9416   | DDX23   | -0,619607081 | 0,006550431 |
| 10212  | DDX39A  | -0,773561959 | 0,000352258 |
| 9879   | DDX46   | -0,795155254 | 7,14E-05    |
| 54849  | DEF8    | -0,771924487 | 0,000761708 |
| 7913   | DEK     | -0,708352434 | 0,000333554 |
| 55635  | DEPDC1  | -1,208971107 | 0,001020983 |
| 55789  | DEPDC1B | -0,818108484 | 0,000320423 |
| 91614  | DEPDC7  | -0,635210818 | 0,001296391 |
| 1717   | DHCR7   | -0,743805061 | 0,000476859 |
| 9249   | DHRS3   | -1,111869564 | 0,00110423  |
| 1665   | DHX15   | -0,813888344 | 0,000157901 |
| 81624  | DIAPH3  | -0,670433999 | 0,004318792 |
| 1739   | DLG1    | -0,649139258 | 0,001703395 |
| 9787   | DLGAP5  | -1,04891051  | 2,36E-05    |
| 11144  | DMC1    | -0,693830671 | 0,003077685 |
| 1763   | DNA2    | -0,969758707 | 0,000258167 |
| 3301   | DNAJA1  | -0,595735333 | 0,005055753 |
| 51726  | DNAJB11 | -0,671248029 | 0,001820328 |
| 22826  | DNAJC8  | -0,706365529 | 0,001717787 |
| 1786   | DNMT1   | -0,679027238 | 0,000857847 |
| 1789   | DNMT3B  | -1,132914039 | 0,00011258  |
| 29980  | DONSON  | -1,281379338 | 4,50E-06    |
| 79075  | DSCC1   | -1,143607913 | 2,31E-05    |
| 79980  | DSN1    | -1,190367816 | 0,000107116 |
| 51514  | DTL     | -2,044043474 | 5,72E-05    |
| 1841   | DTYMK   | -0,878416054 | 0,000131953 |
| 1852   | DUSP9   | -0,592276294 | 0,007746743 |
| 144455 | E2F7    | -0,807068804 | 0,000970798 |
| 79733  | E2F8    | -2,204358743 | 2,15E-06    |
| 10682  | EBP     | -0,84342416  | 0,000245755 |

|        |         |              |             |
|--------|---------|--------------|-------------|
| 1894   | ECT2    | -1,207213672 | 1,57E-05    |
| 8726   | EED     | -0,904639273 | 4,69E-05    |
| 9521   | EEF1E1  | -0,653796634 | 0,000603611 |
| 1964   | EIF1AX  | -0,63028812  | 0,007107859 |
| 1965   | EIF2S1  | -0,701599786 | 0,000476859 |
| 1994   | ELAVL1  | -0,619623138 | 0,00275319  |
| 146956 | EME1    | -0,635273438 | 0,000235007 |
| 2013   | EMP2    | -0,890070895 | 0,000131953 |
| 58478  | ENOPH1  | -0,592325565 | 0,010651323 |
| 54821  | ERCC6L  | -1,388940927 | 2,00E-05    |
| 157570 | ESCO2   | -1,205684039 | 4,31E-05    |
| 9700   | ESPL1   | -1,106213906 | 6,83E-05    |
| 2108   | ETFA    | -0,610876453 | 0,006520221 |
| 9156   | EXO1    | -2,3920297   | 4,77E-06    |
| 51010  | EXOSC3  | -0,781947338 | 0,001081162 |
| 11340  | EXOSC8  | -1,08482627  | 0,000118567 |
| 5393   | EXOSC9  | -0,648842206 | 0,003790954 |
| 2146   | EZH2    | -0,855287681 | 0,000240223 |
| 63901  | FAM111A | -1,103170389 | 0,000384326 |
| 374393 | FAM111B | -1,094412504 | 0,003418481 |
| 151176 | FAM132B | -0,632247498 | 0,005410724 |
| 113115 | FAM54A  | -1,599276614 | 1,71E-06    |
| 54478  | FAM64A  | -0,815410286 | 0,001161417 |
| 81610  | FAM83D  | -1,429759983 | 9,63E-06    |
| 2175   | FANCA   | -0,791086735 | 0,002890365 |
| 2187   | FANCB   | -1,186440046 | 0,000133987 |
| 2176   | FANCC   | -0,687996006 | 0,000308383 |
| 2189   | FANCG   | -0,858603806 | 0,000393244 |
| 55215  | FANCI   | -1,007281243 | 4,38E-05    |
| 57697  | FANCM   | -0,784635277 | 0,000557224 |
| 79072  | FASTKD3 | -0,594556106 | 0,00558026  |
| 26263  | FBXO22  | -0,600710868 | 0,001242599 |
| 254170 | FBXO33  | -0,665900847 | 0,000698052 |
| 26271  | FBXO5   | -1,85711052  | 4,38E-05    |
| 2222   | FDFT1   | -0,65669764  | 0,002104977 |
| 2224   | FDPS    | -0,731985917 | 0,00038851  |
| 2237   | FEN1    | -1,990889675 | 4,12E-06    |
| 63979  | FIGNL1  | -1,001547441 | 0,000137935 |
| 55033  | FKBP14  | -0,599903724 | 0,001398265 |
| 2289   | FKBP5   | -0,77175087  | 8,30E-05    |
| 79672  | FN3KRP  | -0,673656617 | 0,000316344 |
| 2305   | FOXM1   | -1,066696495 | 0,000842105 |
| 55632  | G2E3    | -0,67126883  | 0,013009109 |
| 2624   | GATA2   | -0,786829642 | 0,007516997 |
| 2632   | GBE1    | -0,833057102 | 0,001658187 |
| 8487   | GEMIN2  | -1,051271276 | 0,00049172  |
| 8836   | GGH     | -0,772201923 | 0,002804425 |
| 9837   | GINS1   | -1,819872865 | 9,36E-05    |
| 51659  | GINS2   | -2,211460762 | 5,31E-06    |
| 64785  | GINS3   | -1,280019793 | 1,46E-05    |
| 84296  | GINS4   | -0,735693454 | 0,000353657 |
| 2717   | GLA     | -0,992015495 | 6,83E-05    |
| 10539  | GLRX3   | -0,666479    | 0,002538276 |
| 51053  | GMNN    | -1,616790622 | 4,77E-06    |



|        |           |              |             |
|--------|-----------|--------------|-------------|
| 29926  | GMPPA     | -0,651898128 | 0,000514416 |
| 54584  | GNB1L     | -0,704520064 | 0,008719218 |
| 10020  | GNE       | -0,625441542 | 0,00431056  |
| 2805   | GOT1      | -0,632457299 | 0,001766421 |
| 29899  | GPSM2     | -0,621082717 | 0,002088456 |
| 84706  | GPT2      | -0,937463736 | 0,011094248 |
| 83903  | GSG2      | -1,167904971 | 0,000784869 |
| 51512  | GTSE1     | -1,109314639 | 1,11E-05    |
| 3014   | H2AFX     | -0,821827077 | 0,001385778 |
| 9555   | H2AFY     | -0,60263158  | 0,000485225 |
| 3015   | H2AFZ     | -1,119973745 | 5,23E-05    |
| 3033   | HADH      | -0,859188176 | 0,000250275 |
| 8520   | HAT1      | -1,456701896 | 2,21E-05    |
| 115106 | HAUS1     | -0,997082194 | 0,001197716 |
| 54801  | HAUS6     | -1,014733405 | 0,000294441 |
| 55559  | HAUS7     | -0,753601284 | 0,000712378 |
| 93323  | HAUS8     | -1,642017723 | 8,69E-06    |
| 3065   | HDAC1     | -0,61026315  | 0,003375267 |
| 3070   | HELLS     | -1,671178336 | 1,71E-06    |
| 26275  | HIBCH     | -0,605550007 | 0,027383349 |
| 3006   | HIST1H1C  | -0,730012868 | 0,013354575 |
| 8332   | HIST1H2AL | -1,07425402  | 0,001118352 |
| 8358   | HIST1H3B  | -0,975563385 | 0,000429323 |
| 8364   | HIST1H4C  | -1,042770502 | 3,72E-05    |
| 8360   | HIST1H4D  | -0,709063376 | 0,005284676 |
| 8367   | HIST1H4E  | -0,622539612 | 0,011261222 |
| 55355  | HJURP     | -0,899118381 | 6,83E-05    |
| 6596   | HLTF      | -0,637784873 | 0,001436321 |
| 3146   | HMGB1     | -0,68955483  | 0,000173103 |
| 3148   | HMGB2     | -0,665167308 | 0,029594746 |
| 3161   | HMMR      | -0,741353962 | 0,001268019 |
| 51155  | HN1       | -1,105357859 | 1,30E-05    |
| 10949  | HNRNPA0   | -0,607895709 | 0,002172474 |
| 220988 | HNRNPA3   | -0,644321103 | 0,000465707 |
| 3182   | HNRNPAB   | -0,805823268 | 0,00033948  |
| 3183   | HNRNPC    | -0,940554742 | 0,000265391 |
| 343069 | HNRNPCL1  | -0,623623527 | 0,004460199 |
| 3184   | HNRNPD    | -0,6350348   | 0,003556122 |
| 3185   | HNRNPF    | -0,611105867 | 0,010102929 |
| 3189   | HNRNPH3   | -0,662988837 | 0,002213064 |
| 10236  | HNRNPR    | -0,6974126   | 0,000515096 |
| 84343  | HPS3      | -0,727603336 | 0,000904138 |
| 3295   | HSD17B4   | -0,592971015 | 0,016241879 |
| 8630   | HSD17B6   | -1,074321176 | 0,001006064 |
| 84263  | HSDL2     | -0,607577186 | 0,001776734 |
| 51182  | HSPA14    | -1,439967206 | 4,72E-05    |
| 3306   | HSPA2     | -1,305115008 | 0,000207204 |
| 22824  | HSPA4L    | -0,64089794  | 0,002421781 |
| 3309   | HSPA5     | -0,608383398 | 0,00093052  |
| 51668  | HSPB11    | -0,713124143 | 0,013863105 |
| 219844 | HYLS1     | -1,094538441 | 1,79E-05    |
| 3397   | ID1       | -1,653543934 | 1,47E-05    |
| 3398   | ID2       | -2,489939804 | 5,23E-05    |
| 3399   | ID3       | -2,016387705 | 5,87E-06    |

|        |          |              |             |
|--------|----------|--------------|-------------|
| 3417   | IDH1     | -1,017274089 | 0,00136324  |
| 3418   | IDH2     | -0,736624129 | 0,00130289  |
| 3422   | IDI1     | -0,964773452 | 8,13E-05    |
| 10437  | IFI30    | -0,697453147 | 0,070550025 |
| 91353  | IGLL3P   | -0,606092961 | 0,079697216 |
| 55540  | IL17RB   | -0,841003474 | 0,000250275 |
| 3608   | ILF2     | -0,653577877 | 0,00596738  |
| 196294 | IMMP1L   | -0,884749071 | 0,003077685 |
| 83729  | INHBE    | -1,162056642 | 0,005892494 |
| 3638   | INSIG1   | -1,113088866 | 0,000128305 |
| 55756  | INTS9    | -0,669587547 | 0,000240474 |
| 23421  | ITGB3BP  | -1,264867185 | 2,30E-05    |
| 3706   | ITPKA    | -0,759110231 | 0,001436321 |
| 122953 | JDP2     | -0,591211309 | 0,001458961 |
| 79070  | KDELC1   | -0,730766185 | 0,004455134 |
| 9768   | KIAA0101 | -0,979147951 | 3,48E-05    |
| 9692   | KIAA0391 | -0,613543577 | 0,002035187 |
| 57650  | KIAA1524 | -0,848308242 | 0,000157241 |
| 3832   | KIF11    | -1,13008493  | 1,20E-05    |
| 9928   | KIF14    | -0,716415216 | 0,002106642 |
| 56992  | KIF15    | -1,077503832 | 0,000290842 |
| 81930  | KIF18A   | -0,820724469 | 0,010170868 |
| 10112  | KIF20A   | -1,003061412 | 0,001550052 |
| 9585   | KIF20B   | -0,62482078  | 0,036796973 |
| 3835   | KIF22    | -0,77064126  | 6,35E-05    |
| 9493   | KIF23    | -1,261109399 | 3,37E-05    |
| 11004  | KIF2C    | -1,134773966 | 2,30E-05    |
| 24137  | KIF4A    | -0,753767123 | 0,000748329 |
| 3833   | KIFC1    | -1,542367926 | 1,85E-05    |
| 3812   | KIR3DL2  | -0,642780009 | 0,036178409 |
| 3839   | KPNA3    | -0,696599853 | 0,001436321 |
| 144501 | KRT80    | -1,258969248 | 0,002022637 |
| 3930   | LBR      | -0,686657214 | 0,020585488 |
| 3978   | LIG1     | -0,891923161 | 0,000131477 |
| 286826 | LIN9     | -0,923082827 | 1,55E-05    |
| 9388   | LIPG     | -0,747675929 | 0,048839113 |
| 4001   | LMNB1    | -1,345001875 | 0,00046218  |
| 84823  | LMNB2    | -0,992926841 | 0,000105821 |
| 10162  | LPCAT3   | -0,596992524 | 0,006102831 |
| 122769 | LRR1     | -1,455480827 | 2,15E-06    |
| 55379  | LRRC59   | -0,724236478 | 0,013276302 |
| 57819  | LSM2     | -0,796972431 | 0,001230453 |
| 25804  | LSM4     | -0,741294799 | 0,000546177 |
| 84316  | LSMD1    | -0,617420543 | 0,001024816 |
| 55646  | LYAR     | -0,790889957 | 0,00211618  |
| 4085   | MAD2L1   | -1,369287895 | 0,000112268 |
| 55110  | MAGOHB   | -0,608930441 | 0,006400049 |
| 7873   | MANF     | -0,702675764 | 0,000143309 |
| 55700  | MAP7D1   | -0,635044491 | 0,000254931 |
| 4141   | MARS     | -0,988516809 | 0,000311472 |
| 84930  | MASTL    | -1,734784827 | 1,79E-05    |
| 55388  | MCM10    | -2,324420114 | 0,000106503 |
| 4171   | MCM2     | -1,303311806 | 3,40E-05    |
| 4172   | MCM3     | -1,676538038 | 2,85E-05    |

|        |          |              |             |
|--------|----------|--------------|-------------|
| 4173   | MCM4     | -1,4915538   | 4,12E-06    |
| 4174   | MCM5     | -1,595634733 | 0,000258279 |
| 4175   | MCM6     | -1,021744954 | 3,20E-05    |
| 4176   | MCM7     | -1,223788895 | 6,83E-05    |
| 84515  | MCM8     | -0,710830501 | 0,000465707 |
| 79892  | MCMBP    | -0,728567153 | 0,00051709  |
| 9412   | MED21    | -0,740284592 | 0,004861326 |
| 90390  | MED30    | -0,603242823 | 0,033373113 |
| 9833   | MELK     | -1,262196847 | 1,14E-05    |
| 56339  | METTL3   | -0,804801442 | 0,000211746 |
| 25840  | METTL7A  | -0,831790708 | 0,003180392 |
| 4257   | MGST1    | -0,792749113 | 0,006797954 |
| 4277   | MICB     | -1,288951508 | 9,88E-06    |
| 79003  | MIS12    | -0,64734259  | 0,025759891 |
| 54069  | MIS18A   | -0,957031151 | 2,45E-05    |
| 129531 | MITD1    | -0,718944198 | 0,015266545 |
| 4288   | MKI67    | -0,847183831 | 0,001275912 |
| 79682  | MLF1IP   | -0,80925201  | 9,02E-05    |
| 10962  | MLLT11   | -1,431605738 | 0,002362714 |
| 84057  | MND1     | -1,588447231 | 5,39E-05    |
| 84300  | MNF1     | -0,645938177 | 0,001544694 |
| 9526   | MPDU1    | -0,796125738 | 0,002592447 |
| 10200  | MPHOSPH6 | -0,637997298 | 0,000529087 |
| 54948  | MRPL16   | -0,678693392 | 0,007116138 |
| 29074  | MRPL18   | -0,733108495 | 0,010851803 |
| 10573  | MRPL28   | -0,636442004 | 0,003680958 |
| 51318  | MRPL35   | -0,635939916 | 0,000757116 |
| 26589  | MRPL46   | -0,597991259 | 0,00081825  |
| 51154  | MRTO4    | -0,592279806 | 0,011956504 |
| 4436   | MSH2     | -0,795413361 | 0,002552727 |
| 2956   | MSH6     | -1,087557126 | 0,00041927  |
| 9219   | MTA2     | -0,637891087 | 0,003893621 |
| 23788  | MTCH2    | -0,684134653 | 0,001024816 |
| 10797  | MTHFD2   | -1,253847445 | 0,00582819  |
| 4605   | MYBL2    | -0,954766948 | 3,20E-05    |
| 80155  | NAA15    | -0,683026854 | 0,001049498 |
| 80218  | NAA50    | -0,675135312 | 0,006116874 |
| 4676   | NAP1L4   | -0,755901379 | 0,003562435 |
| 26502  | NARF     | -0,646550644 | 0,000372762 |
| 4678   | NASP     | -1,013837582 | 6,62E-05    |
| 9918   | NCAPD2   | -0,681159112 | 0,000641162 |
| 23310  | NCAPD3   | -0,96070661  | 3,99E-05    |
| 64151  | NCAPG    | -1,025742651 | 3,31E-05    |
| 54892  | NCAPG2   | -1,40461138  | 4,36E-06    |
| 23397  | NCAPH    | -1,625007687 | 1,71E-06    |
| 10403  | NDC80    | -1,027736956 | 0,000150405 |
| 4704   | NDUFA9   | -0,598986254 | 0,022112575 |
| 55247  | NEIL3    | -1,384819054 | 4,33E-06    |
| 4751   | NEK2     | -0,83727809  | 0,002607741 |
| 54492  | NEURL1B  | -0,963075295 | 9,90E-05    |
| 60491  | NIF3L1   | -0,608436977 | 0,000423534 |
| 4833   | NME4     | -0,731247245 | 0,003327507 |
| 25926  | NOL11    | -0,625651515 | 0,001520529 |
| 11270  | NRM      | -0,676122002 | 0,003201383 |

|        |         |              |             |
|--------|---------|--------------|-------------|
| 54780  | NSMCE4A | -0,730102938 | 0,004460199 |
| 64943  | NT5DC2  | -0,738572514 | 0,000336843 |
| 10726  | NUDC    | -0,716072707 | 0,000313127 |
| 4521   | NUDT1   | -1,049848272 | 0,000211746 |
| 55270  | NUDT15  | -0,740722356 | 0,001019032 |
| 11164  | NUDT5   | -0,841032084 | 0,000384529 |
| 83540  | NUF2    | -0,906808622 | 0,000245089 |
| 57122  | NUP107  | -0,811649857 | 0,000659    |
| 23165  | NUP205  | -0,743773156 | 0,000172555 |
| 129401 | NUP35   | -1,006731235 | 3,08E-05    |
| 23636  | NUP62   | -0,840860433 | 5,20E-05    |
| 79902  | NUP85   | -0,970007401 | 8,76E-05    |
| 9688   | NUP93   | -0,590131489 | 0,002488291 |
| 51203  | NUSAP1  | -1,158827596 | 2,35E-05    |
| 29107  | NXT1    | -0,641570455 | 0,002034119 |
| 11339  | OIP5    | -1,448014377 | 2,03E-05    |
| 4998   | ORC1    | -1,909264582 | 2,46E-05    |
| 23594  | ORC6    | -1,510439762 | 4,12E-06    |
| 92106  | OXNAD1  | -0,644361301 | 0,000372852 |
| 5033   | P4HA1   | -0,700615274 | 0,001601697 |
| 5036   | PA2G4   | -0,888180404 | 0,003585242 |
| 10606  | PAICS   | -0,758561714 | 0,00051709  |
| 10038  | PARP2   | -1,064852164 | 2,04E-05    |
| 55010  | PARBP   | -1,099070657 | 4,67E-05    |
| 23178  | PASK    | -0,96175613  | 0,000131953 |
| 5080   | PAX6    | -0,665298937 | 0,009773168 |
| 55872  | PBK     | -1,573623272 | 4,77E-06    |
| 5111   | PCNA    | -1,818383273 | 1,71E-06    |
| 5082   | PDCL    | -0,787196357 | 0,013871152 |
| 5147   | PDE6D   | -0,652198064 | 0,077323793 |
| 23590  | PDSS1   | -0,927556022 | 0,000449186 |
| 57107  | PDSS2   | -0,697697021 | 0,001161417 |
| 57026  | PDXP    | -0,688143819 | 0,000818505 |
| 5226   | PGD     | -0,699952334 | 0,003608326 |
| 283871 | PGP     | -0,592425916 | 0,001509219 |
| 26147  | PHF19   | -0,742543481 | 0,000137609 |
| 26227  | PHGDH   | -0,939144279 | 3,63E-05    |
| 5277   | PIGA    | -0,767434555 | 0,001325129 |
| 8503   | PIK3R3  | -1,043605106 | 0,000118567 |
| 30849  | PIK3R4  | -0,628834483 | 0,001879303 |
| 11040  | PIM2    | -0,60932787  | 0,002148721 |
| 8544   | PIR     | -0,669320408 | 0,000645718 |
| 9088   | PKMYT1  | -0,975126211 | 1,96E-05    |
| 51316  | PLAC8   | -0,805560798 | 0,046518785 |
| 51196  | PLCE1   | -0,666012489 | 0,013374274 |
| 55344  | PLCXD1  | -0,801451185 | 5,23E-05    |
| 10733  | PLK4    | -0,595177048 | 0,001081162 |
| 5357   | PLS1    | -0,858801086 | 0,000110839 |
| 5358   | PLS3    | -0,62361638  | 0,001084818 |
| 5359   | PLSCR1  | -0,677268871 | 0,013957169 |
| 5411   | PNN     | -0,752198346 | 0,003348207 |
| 56902  | PNO1    | -0,64752981  | 0,004837879 |
| 25886  | POC1A   | -0,830189556 | 0,000659    |
| 5422   | POLA1   | -0,696280539 | 0,005403908 |

|        |          |              |             |
|--------|----------|--------------|-------------|
| 23649  | POLA2    | -1,749991483 | 7,95E-05    |
| 5424   | POLD1    | -0,694021869 | 0,000245755 |
| 10714  | POLD3    | -1,247523755 | 0,000310313 |
| 5427   | POLE2    | -1,993850361 | 4,12E-06    |
| 54107  | POLE3    | -0,638846621 | 0,02967876  |
| 10721  | POLQ     | -0,991841911 | 0,000714953 |
| 10622  | POLR3G   | -0,59013292  | 0,061541339 |
| 51728  | POLR3K   | -1,213753857 | 6,26E-05    |
| 10248  | POP7     | -0,630286934 | 0,007660417 |
| 8611   | PPAP2A   | -0,597971049 | 0,001564911 |
| 10105  | PPIF     | -0,677793675 | 0,006534852 |
| 10465  | PPIH     | -0,827506882 | 0,000173053 |
| 5496   | PPM1G    | -0,738301472 | 0,000636223 |
| 5537   | PPP6C    | -0,640508364 | 0,000935643 |
| 9055   | PRC1     | -1,187419911 | 4,78E-05    |
| 10935  | PRDX3    | -0,708739905 | 0,000661723 |
| 5557   | PRIM1    | -1,293911741 | 2,30E-05    |
| 5558   | PRIM2    | -0,718967554 | 0,001800678 |
| 145270 | PRIMA1   | -0,799771443 | 0,011304873 |
| 27339  | PRPF19   | -0,611153711 | 0,006401428 |
| 84950  | PRPF38A  | -0,652362528 | 0,004115425 |
| 9128   | PRPF4    | -0,739362096 | 0,000319079 |
| 5631   | PRPS1    | -0,922882973 | 0,000157674 |
| 56952  | PRTFDC1  | -0,670174315 | 0,004036964 |
| 29968  | PSAT1    | -1,555134904 | 3,40E-05    |
| 5683   | PSMA2    | -0,808577646 | 0,000434257 |
| 5684   | PSMA3    | -0,950954403 | 0,001888329 |
| 5687   | PSMA6    | -0,673860411 | 0,000588577 |
| 5702   | PSMC3    | -0,758700594 | 0,003679715 |
| 29893  | PSMC3IP  | -0,811880875 | 0,000169156 |
| 5716   | PSMD10   | -0,743454906 | 0,005684461 |
| 5717   | PSMD11   | -0,619608975 | 0,000589852 |
| 10197  | PSME3    | -0,714404983 | 0,000917444 |
| 8624   | PSMG1    | -0,841386415 | 0,000434772 |
| 84262  | PSMG3    | -0,733084475 | 0,001565253 |
| 84722  | PSRC1    | -1,281270578 | 4,77E-06    |
| 9536   | PTGES    | -0,934370103 | 4,31E-05    |
| 10728  | PTGES3   | -0,731704805 | 0,000938009 |
| 51495  | PTPLAD1  | -0,624986406 | 0,000365288 |
| 9232   | PTTG1    | -0,877856603 | 0,000395997 |
| 29920  | PYCR2    | -0,648676819 | 0,000326317 |
| 5861   | RAB1A    | -0,608718333 | 0,003420689 |
| 5878   | RAB5C    | -0,606601672 | 0,004076539 |
| 29127  | RACGAP1  | -1,0285742   | 0,000408312 |
| 5810   | RAD1     | -0,664355686 | 0,000348471 |
| 5888   | RAD51    | -1,090045033 | 5,39E-05    |
| 10635  | RAD51AP1 | -1,914224769 | 1,71E-06    |
| 5889   | RAD51C   | -1,218814475 | 2,00E-05    |
| 25788  | RAD54B   | -1,036812458 | 0,000308383 |
| 8438   | RAD54L   | -1,738953183 | 1,51E-05    |
| 5902   | RANBP1   | -0,891212916 | 0,000458477 |
| 387496 | RASL11A  | -0,72041322  | 0,007660887 |
| 5928   | RBBP4    | -0,70402778  | 0,000834956 |
| 5932   | RBBP8    | -0,829995558 | 0,00046479  |

|        |          |              |             |
|--------|----------|--------------|-------------|
| 83759  | RBM4B    | -0,659029935 | 0,033050881 |
| 1104   | RCC1     | -0,88159694  | 0,000141603 |
| 55920  | RCC2     | -0,865187798 | 0,004395241 |
| 5981   | RFC1     | -0,63314047  | 0,000372762 |
| 5982   | RFC2     | -1,310609213 | 5,82E-06    |
| 5983   | RFC3     | -1,230133096 | 3,33E-05    |
| 5984   | RFC4     | -1,578423477 | 4,36E-06    |
| 5985   | RFC5     | -1,644828764 | 1,71E-06    |
| 55159  | RFWD3    | -0,858988139 | 0,002690079 |
| 26150  | RIBC2    | -1,285459326 | 2,73E-05    |
| 80010  | RMI1     | -1,242586475 | 3,37E-05    |
| 116028 | RMI2     | -0,8053167   | 0,000948323 |
| 10535  | RNASEH2A | -1,238367741 | 1,65E-05    |
| 6047   | RNF4     | -0,634754879 | 0,001161417 |
| 6117   | RPA1     | -0,887580579 | 4,38E-05    |
| 6118   | RPA2     | -0,832810422 | 0,000141528 |
| 6119   | RPA3     | -0,617399029 | 0,030913982 |
| 6195   | RPS6KA1  | -0,860904275 | 0,000701558 |
| 9125   | RQCD1    | -0,930055982 | 0,00010472  |
| 6240   | RRM1     | -1,014196704 | 0,000164581 |
| 6241   | RRM2     | -1,897208488 | 4,77E-06    |
| 88745  | RRP36    | -0,699074758 | 0,002095469 |
| 84816  | RTN4IP1  | -0,818801978 | 0,001340141 |
| 25914  | RTTN     | -0,617101391 | 0,001221861 |
| 8607   | RUVBL1   | -0,613771185 | 0,001132171 |
| 113174 | SAAL1    | -0,851024512 | 0,000308383 |
| 10055  | SAE1     | -0,788022145 | 0,000125371 |
| 8819   | SAP30    | -0,730732084 | 0,016174466 |
| 163786 | SASS6    | -1,402646609 | 2,39E-05    |
| 6382   | SDC1     | -0,714537506 | 0,013863105 |
| 23753  | SDF2L1   | -1,292196351 | 0,000159575 |
| 6390   | SDHB     | -0,71929587  | 0,010811623 |
| 9554   | SEC22B   | -0,602739821 | 0,008582885 |
| 10484  | SEC23A   | -0,68227909  | 0,010814118 |
| 83642  | SELO     | -0,749845372 | 0,001398265 |
| 22929  | SEPHS1   | -0,832627816 | 6,26E-05    |
| 83667  | SESN2    | -0,697617036 | 0,001513566 |
| 10946  | SF3A3    | -0,611180552 | 0,000288769 |
| 151246 | SGOL2    | -1,097995707 | 7,14E-05    |
| 79801  | SHCBP1   | -1,544333332 | 3,12E-05    |
| 6470   | SHMT1    | -0,803379573 | 0,001717787 |
| 6472   | SHMT2    | -0,634773197 | 0,001065687 |
| 23409  | SIRT4    | -0,77250511  | 0,003989189 |
| 10572  | SIVA1    | -0,69847299  | 0,002402864 |
| 220134 | SKA1     | -1,490029603 | 0,000241522 |
| 221150 | SKA3     | -1,030624356 | 2,41E-05    |
| 6502   | SKP2     | -1,162639255 | 0,000245089 |
| 7884   | SLBP     | -0,863386583 | 0,000305778 |
| 6576   | SLC25A1  | -0,666457069 | 0,000696397 |
| 2030   | SLC29A1  | -0,726048434 | 0,00103998  |
| 1317   | SLC31A1  | -0,629526267 | 0,002690079 |
| 6520   | SLC3A2   | -0,750200923 | 0,013871152 |
| 6539   | SLC6A12  | -0,665987843 | 0,032200933 |
| 8140   | SLC7A5   | -0,987630596 | 0,068101806 |



|        |          |              |             |
|--------|----------|--------------|-------------|
| 10592  | SMC2     | -0,991438687 | 1,97E-05    |
| 9126   | SMC3     | -0,592036898 | 0,062016002 |
| 10051  | SMC4     | -1,005888939 | 2,45E-05    |
| 10285  | SMNDC1   | -0,763265662 | 0,001874969 |
| 79622  | SNRNP25  | -0,745823747 | 0,002030959 |
| 9410   | SNRNP40  | -0,871370268 | 0,000517378 |
| 6632   | SNRPD1   | -0,635823564 | 0,002215638 |
| 6636   | SNRPF    | -0,672640757 | 0,010056898 |
| 6648   | SOD2     | -0,6852207   | 0,000336843 |
| 10615  | SPAG5    | -1,063161913 | 6,36E-05    |
| 57405  | SPC25    | -1,681998532 | 1,71E-06    |
| 139886 | SPIN4    | -0,767868513 | 0,004297681 |
| 63826  | SRR      | -0,944964843 | 0,000240223 |
| 10250  | SRRM1    | -0,713086341 | 0,0028217   |
| 6426   | SRSF1    | -0,685996196 | 0,000372852 |
| 10772  | SRSF10   | -0,805578757 | 0,000137609 |
| 6427   | SRSF2    | -0,99139649  | 0,000183937 |
| 6428   | SRSF3    | -0,72773583  | 0,000711518 |
| 6429   | SRSF4    | -0,87518413  | 0,000123192 |
| 6432   | SRSF7    | -0,981248038 | 1,11E-05    |
| 6491   | STIL     | -1,121826723 | 3,72E-05    |
| 10963  | STIP1    | -0,714107306 | 0,001192494 |
| 8803   | SUCLA2   | -0,821242816 | 0,000706766 |
| 6839   | SUV39H1  | -0,911107692 | 0,003451335 |
| 10492  | SYNCRIP  | -0,772483784 | 0,00049221  |
| 10460  | TACC3    | -1,106033792 | 1,55E-05    |
| 9015   | TAF1A    | -0,740501558 | 0,001011325 |
| 6877   | TAF5     | -1,292454123 | 4,77E-06    |
| 8407   | TAGLN2   | -0,717201456 | 0,000611552 |
| 6897   | TARS     | -0,767872401 | 0,000637165 |
| 51256  | TBC1D7   | -0,876632157 | 4,38E-05    |
| 6941   | TCF19    | -1,863909569 | 2,95E-05    |
| 140290 | TCP10L   | -0,80560527  | 0,00033948  |
| 55775  | TDP1     | -0,691587295 | 0,000517378 |
| 93081  | TEX30    | -0,838989736 | 6,62E-05    |
| 7027   | TFDP1    | -1,040903447 | 0,000234343 |
| 92610  | TIFA     | -0,939666266 | 0,008582597 |
| 8914   | TIMELESS | -0,963123576 | 0,000123192 |
| 54962  | TIPIN    | -0,959141056 | 9,02E-05    |
| 7083   | TK1      | -1,540168559 | 1,16E-05    |
| 79073  | TMEM109  | -0,882555775 | 0,000111158 |
| 51524  | TMEM138  | -0,678559099 | 0,000612937 |
| 23306  | TMEM194A | -0,59991118  | 0,010577305 |
| 7112   | TMPO     | -1,242640572 | 1,72E-05    |
| 10140  | TOB1     | -0,668144089 | 0,00853743  |
| 401505 | TOMM5    | -0,663852626 | 0,00323342  |
| 7153   | TOP2A    | -0,927782158 | 0,000772822 |
| 11073  | TOPBP1   | -0,628572493 | 0,003875506 |
| 64222  | TOR3A    | -0,625679079 | 0,002544336 |
| 51002  | TPRKB    | -0,705951655 | 0,001833234 |
| 22974  | TPX2     | -1,360495685 | 1,65E-05    |
| 29896  | TRA2A    | -0,786379774 | 0,000270053 |
| 10293  | TRAIP    | -0,762476154 | 0,000728624 |
| 9319   | TRIP13   | -1,083919756 | 4,31E-05    |

|        |          |              |             |
|--------|----------|--------------|-------------|
| 60487  | TRMT11   | -0,743490596 | 0,018139326 |
| 10102  | TSFM     | -0,594484779 | 0,001741566 |
| 7272   | TTK      | -1,201069501 | 1,30E-05    |
| 203068 | TUBB     | -0,763715683 | 0,003300958 |
| 347733 | TUBB2B   | -0,998531245 | 0,002189913 |
| 51174  | TUBD1    | -0,625041848 | 0,013196292 |
| 7283   | TUBG1    | -0,844105919 | 3,49E-05    |
| 27229  | TUBGCP4  | -0,807829954 | 0,000141651 |
| 7298   | TYMS     | -1,566400217 | 5,31E-06    |
| 11065  | UBE2C    | -1,00217682  | 0,001606499 |
| 9040   | UBE2M    | -0,737281369 | 0,00403557  |
| 7334   | UBE2N    | -0,782658148 | 0,001166107 |
| 29089  | UBE2T    | -1,526860579 | 2,31E-05    |
| 55148  | UBR7     | -1,045381887 | 3,00E-05    |
| 51377  | UCLH5    | -0,665205116 | 0,000372852 |
| 7360   | UGP2     | -0,644895565 | 0,006401428 |
| 7374   | UNG      | -0,746411467 | 0,000112268 |
| 7398   | USP1     | -1,072841984 | 2,30E-05    |
| 10713  | USP39    | -0,789490177 | 0,000245755 |
| 51118  | UTP11L   | -0,619656058 | 0,000637528 |
| 7411   | VBP1     | -0,706760565 | 0,000609742 |
| 7436   | VLDLR    | -0,947080834 | 0,000234269 |
| 11311  | VPS45    | -0,712373444 | 0,004762895 |
| 7443   | VRK1     | -1,218100717 | 7,43E-06    |
| 7453   | WARS     | -1,082931999 | 0,000133493 |
| 11169  | WDHD1    | -1,185708601 | 5,22E-05    |
| 79446  | WDR25    | -0,592300056 | 0,056854377 |
| 79968  | WDR76    | -1,378489263 | 1,00E-05    |
| 55135  | WRAP53   | -0,966470426 | 3,64E-05    |
| 91419  | XRCC6BP1 | -1,415012005 | 4,72E-05    |
| 8565   | YARS     | -0,919004476 | 0,001304255 |
| 7533   | YWHAH    | -0,647568446 | 0,00159424  |
| 150244 | ZDHHC8P1 | -0,882824606 | 0,003141014 |
| 195828 | ZNF367   | -2,127520229 | 0,001192494 |
| 118738 | ZNF488   | -0,928008636 | 0,003650386 |
| 55055  | ZWILCH   | -1,173498283 | 0,000298258 |
| 11130  | ZWINT    | -1,649855992 | 1,85E-06    |
